# Supplementary material for: Integrative Analysis of DNA Methylation and Gene Expression Data Identifies EPAS1 as a Key Regulator of COPD
Source: PLOS journal article supplement (doi:10.1371/journal.pgen.1004898), 2015-01-08
Supplement: S20 (10.1371/journal.pgen.1004898.s020) [file journal.pgen.1004898.s020]

**STable 11. Overlap between downstream genes of key regulators in COPD lung tissues and COPD severity signatures in human**

| Regulator | Downstream | DLCO_overlap | DLCO_pvalue | BODE_overlap | BODE_pvalue | FEV1_overlap | FEV1_pvalue | Ratio_overlap | Ratio_pvalue | Emphysema_overlap | Emphysema_pvalue |
|-----------|------------|--------------|-------------|--------------|-------------|--------------|-------------|---------------|--------------|-------------------|------------------|
| GAK       | 1817       | 32           | 1           | 96           | 0.99969     | 37           | 0.99984     | 26            | 0.99117      | 108               | 1                |
| ACSF3     | 1549       | 35           | 0.99939     | 106          | 0.69323     | 14           | 1           | 10            | 1            | 105               | 0.999999513      |
| CLCN7     | 1506       | 25           | 1           | 78           | 0.99947     | 17           | 1           | 8             | 1            | 100               | 0.999999758      |
| ALG12     | 1357       | 39           | 0.94612     | 149          | 3.63E-08    | 11           | 1           | 6             | 1            | 113               | 0.992089698      |
| ABHD14B   | 1300       | 17           | 1           | 31           | 1           | 9            | 1           | 5             | 1            | 138               | 0.288805616      |
| SCRIB     | 1255       | 16           | 1           | 60           | 0.99985     | 8            | 1           | 1             | 1            | 70                | 0.999999999      |
| SSNA1     | 1224       | 23           | 0.99991     | 62           | 0.99907     | 7            | 1           | 3             | 1            | 57                | 1                |
| HIST1H2BG | 1190       | 17           | 1           | 46           | 1           | 3            | 1           | 0             | 1            | 74                | 0.999999723      |
| SELO      | 1131       | 29           | 0.98222     | 92           | 0.09751     | 8            | 1           | 0             | 1            | 70                | 0.999999552      |
| ZFYVE26   | 1126       | 34           | 0.87989     | 83           | 0.38927     | 40           | 0.37076     | 19            | 0.87981      | 224               | 1.22E-24         |
| THOP1     | 1124       | 31           | 0.95518     | 134          | 1.23E-09    | 16           | 0.99999     | 7             | 0.99999      | 109               | 0.70898873       |
| C6orf226  | 1080       | 26           | 0.99123     | 49           | 0.99989     | 29           | 0.91413     | 14            | 0.9857       | 172               | 5.58E-10         |
| SRI       | 1005       | 30           | 0.88027     | 65           | 0.81706     | 3            | 1           | 1             | 1            | 52                | 0.999999998      |
| DAGLB     | 1004       | 18           | 0.99982     | 50           | 0.9983      | 3            | 1           | 0             | 1            | 47                | 1                |
| MED16     | 1004       | 30           | 0.87905     | 102          | 0.00015     | 6            | 1           | 4             | 1            | 85                | 0.971483759      |
| TSGA10    | 1001       | 10           | 1           | 34           | 1           | 5            | 1           | 1             | 1            | 43                | 1                |
| C13orf27  | 986        | 18           | 0.99973     | 36           | 1           | 4            | 1           | 5             | 1            | 145               | 1.91E-06         |
| SEC16A    | 974        | 30           | 0.83769     | 111          | 3.94E-07    | 7            | 1           | 3             | 1            | 101               | 0.418399012      |
| PMPCA     | 966        | 25           | 0.97109     | 91           | 0.00348     | 16           | 0.99967     | 6             | 0.99997      | 48                | 0.999999999      |
| DEDD2     | 949        | 14           | 0.99998     | 21           | 1           | 1            | 1           | 4             | 1            | 61                | 0.999986414      |
| SETBP1    | 899        | 14           | 0.99995     | 30           | 1           | 6            | 1           | 4             | 1            | 32                | 1                |
| DNAJA1    | 884        | 8            | 1           | 12           | 1           | 6            | 1           | 0             | 1            | 91                | 0.454045582      |
| ADRM1     | 858        | 33           | 0.37005     | 130          | 5.26E-17    | 19           | 0.982       | 12            | 0.95639      | 100               | 0.074348286      |
| MATK      | 840        | 10           | 1           | 28           | 1           | 6            | 1           | 2             | 1            | 61                | 0.998730138      |
| NUDT16L1  | 827        | 21           | 0.96745     | 61           | 0.40868     | 18           | 0.98345     | 8             | 0.99706      | 66                | 0.98714083       |

|          |     |    |          |     |          |    |          |    |          |     |             |
|----------|-----|----|----------|-----|----------|----|----------|----|----------|-----|-------------|
| PLXNB2   | 826 | 5  | 1        | 17  | 1        | 6  | 1        | 5  | 0.99992  | 70  | 0.956873826 |
| COASY    | 814 | 12 | 0.99994  | 27  | 1        | 3  | 1        | 4  | 0.99998  | 79  | 0.680164978 |
| JMJD1C   | 811 | 15 | 0.99902  | 43  | 0.98689  | 5  | 1        | 5  | 0.9999   | 45  | 0.999999415 |
| HINT2    | 804 | 7  | 1        | 26  | 1        | 3  | 1        | 0  | 1        | 86  | 0.311711167 |
| EPAS1    | 779 | 73 | 3.73E-14 | 100 | 4.45E-09 | 97 | 2.01E-30 | 48 | 2.41E-11 | 98  | 0.013729816 |
| NADSYN1  | 765 | 12 | 0.99981  | 37  | 0.99681  | 6  | 1        | 3  | 0.99999  | 37  | 0.999999984 |
| NCAPD2   | 753 | 11 | 0.99991  | 19  | 1        | 8  | 0.99999  | 3  | 0.99999  | 60  | 0.983829348 |
| MOBKL2A  | 751 | 11 | 0.9999   | 44  | 0.93113  | 3  | 1        | 0  | 1        | 43  | 0.999996241 |
| PAX9     | 751 | 7  | 1        | 18  | 1        | 9  | 0.99996  | 5  | 0.9997   | 30  | 1           |
| C3orf26  | 750 | 9  | 0.99999  | 28  | 0.99998  | 1  | 1        | 1  | 1        | 41  | 0.999999038 |
| ATAD1    | 745 | 9  | 0.99999  | 21  | 1        | 0  | 1        | 0  | 1        | 51  | 0.999459463 |
| RPS6     | 742 | 28 | 0.42442  | 46  | 0.86133  | 10 | 0.99984  | 0  | 1        | 34  | 0.999999995 |
| TMEM102  | 741 | 17 | 0.98488  | 47  | 0.82222  | 3  | 1        | 0  | 1        | 27  | 1           |
| FO XK2   | 739 | 26 | 0.57629  | 99  | 5.39E-10 | 11 | 0.99954  | 5  | 0.99963  | 90  | 0.036639426 |
| C19orf29 | 713 | 20 | 0.9011   | 68  | 0.00824  | 12 | 0.99801  | 3  | 0.99998  | 49  | 0.999236729 |
| MAP3K8   | 710 | 9  | 0.99997  | 25  | 0.99999  | 5  | 1        | 2  | 1        | 105 | 4.16E-05    |
| NCLN     | 697 | 11 | 0.99963  | 46  | 0.73226  | 7  | 0.99999  | 1  | 1        | 38  | 0.999997914 |
| B4GALT7  | 695 | 17 | 0.9678   | 31  | 0.99885  | 10 | 0.99953  | 3  | 0.99997  | 50  | 0.997515856 |
| YOD1     | 688 | 11 | 0.99954  | 41  | 0.90517  | 9  | 0.99981  | 2  | 1        | 157 | 1.82E-23    |
| FKBP7    | 686 | 18 | 0.93956  | 32  | 0.99733  | 17 | 0.92528  | 18 | 0.20871  | 54  | 0.983616344 |
| FIP1L1   | 684 | 16 | 0.97781  | 27  | 0.99987  | 6  | 1        | 2  | 1        | 48  | 0.998463302 |
| BRD9     | 681 | 10 | 0.9998   | 35  | 0.98692  | 4  | 1        | 3  | 0.99996  | 24  | 1           |
| ERGIC2   | 679 | 4  | 1        | 15  | 1        | 0  | 1        | 0  | 1        | 29  | 0.999999997 |
| TMEM42   | 649 | 14 | 0.988    | 26  | 0.99975  | 4  | 1        | 3  | 0.99992  | 190 | 2.14E-44    |
| FLI1     | 639 | 18 | 0.88629  | 88  | 1.33E-09 | 14 | 0.96853  | 7  | 0.98406  | 155 | 4.01E-26    |
| MVD      | 638 | 17 | 0.92467  | 53  | 0.13585  | 7  | 0.99994  | 1  | 1        | 26  | 0.999999998 |
| NEK8     | 635 | 6  | 1        | 18  | 1        | 2  | 1        | 1  | 1        | 41  | 0.999651341 |
| DDX59    | 628 | 6  | 0.99999  | 12  | 1        | 4  | 1        | 2  | 0.99998  | 41  | 0.99952063  |
| AXIN1    | 626 | 17 | 0.91109  | 64  | 0.00216  | 5  | 1        | 0  | 1        | 54  | 0.9133209   |

|          |     |    |         |    |          |    |         |    |         |     |             |
|----------|-----|----|---------|----|----------|----|---------|----|---------|-----|-------------|
| EFNA3    | 626 | 6  | 0.99999 | 7  | 1        | 0  | 1       | 0  | 1       | 31  | 0.999999449 |
| REV3L    | 606 | 5  | 1       | 7  | 1        | 1  | 1       | 0  | 1       | 38  | 0.999757962 |
| MUTED    | 600 | 25 | 0.25126 | 43 | 0.50928  | 8  | 0.99948 | 2  | 0.99997 | 41  | 0.998374305 |
| RBM8A    | 600 | 2  | 1       | 20 | 0.99998  | 8  | 0.99948 | 2  | 0.99997 | 23  | 0.999999999 |
| ZC3H18   | 600 | 14 | 0.97119 | 69 | 5.09E-05 | 5  | 0.99999 | 2  | 0.99997 | 42  | 0.997353357 |
| PCYT2    | 595 | 15 | 0.94584 | 32 | 0.96623  | 5  | 0.99999 | 2  | 0.99997 | 25  | 0.999999984 |
| EXOC8    | 580 | 11 | 0.99467 | 16 | 1        | 1  | 1       | 0  | 1       | 50  | 0.906122521 |
| MAP3K7   | 579 | 12 | 0.9884  | 25 | 0.99837  | 7  | 0.99972 | 5  | 0.99483 | 50  | 0.903791973 |
| AASDHPPT | 576 | 11 | 0.99419 | 19 | 0.99998  | 5  | 0.99998 | 1  | 1       | 34  | 0.999910841 |
| USP46    | 574 | 11 | 0.99394 | 14 | 1        | 1  | 1       | 1  | 1       | 47  | 0.953600837 |
| UCKL1    | 569 | 12 | 0.98591 | 23 | 0.99937  | 4  | 1       | 2  | 0.99995 | 40  | 0.996419637 |
| TMC6     | 557 | 2  | 1       | 18 | 0.99998  | 10 | 0.99115 | 4  | 0.99786 | 33  | 0.999876453 |
| CCNA1    | 556 | 7  | 0.99983 | 8  | 1        | 5  | 0.99997 | 4  | 0.99782 | 32  | 0.999933311 |
| CSDE1    | 543 | 7  | 0.99975 | 19 | 0.99991  | 5  | 0.99995 | 2  | 0.99991 | 28  | 0.999992858 |
| AASS     | 532 | 4  | 1       | 11 | 1        | 2  | 1       | 1  | 0.99999 | 30  | 0.999939485 |
| CGGBP1   | 532 | 14 | 0.91458 | 38 | 0.52016  | 6  | 0.99973 | 1  | 0.99999 | 31  | 0.99987934  |
| DNAH3    | 531 | 10 | 0.99323 | 17 | 0.99998  | 12 | 0.94559 | 3  | 0.99923 | 56  | 0.396753538 |
| MRPL12   | 531 | 10 | 0.99323 | 47 | 0.07217  | 1  | 1       | 0  | 1       | 34  | 0.999180295 |
| PPP1CA   | 531 | 5  | 0.99998 | 14 | 1        | 2  | 1       | 1  | 0.99999 | 69  | 0.018320497 |
| SPHK2    | 530 | 8  | 0.99892 | 20 | 0.99967  | 3  | 1       | 1  | 0.99999 | 23  | 0.999999981 |
| IFIH1    | 521 | 14 | 0.89972 | 33 | 0.78712  | 2  | 1       | 0  | 1       | 22  | 0.999999987 |
| WT1-AS   | 519 | 16 | 0.77213 | 41 | 0.26701  | 16 | 0.6691  | 21 | 0.00368 | 56  | 0.329097054 |
| RUNX1T1  | 516 | 21 | 0.31103 | 93 | 3.94E-17 | 22 | 0.14693 | 9  | 0.7714  | 96  | 2.32E-09    |
| HAS2     | 515 | 6  | 0.99985 | 18 | 0.99988  | 2  | 1       | 0  | 1       | 33  | 0.999023449 |
| SLC4A2   | 514 | 5  | 0.99996 | 22 | 0.99756  | 1  | 1       | 0  | 1       | 15  | 1           |
| MEN1     | 510 | 11 | 0.97804 | 19 | 0.99966  | 2  | 1       | 1  | 0.99999 | 131 | 1.33E-24    |
| C16orf70 | 508 | 5  | 0.99996 | 6  | 1        | 1  | 1       | 0  | 1       | 68  | 0.010267787 |
| EZR      | 506 | 5  | 0.99995 | 7  | 1        | 1  | 1       | 2  | 0.9998  | 42  | 0.932042305 |
| COQ5     | 505 | 1  | 1       | 4  | 1        | 1  | 1       | 0  | 1       | 95  | 1.56E-09    |

|          |     |    |         |    |         |    |         |    |         |     |             |
|----------|-----|----|---------|----|---------|----|---------|----|---------|-----|-------------|
| WDR83    | 504 | 14 | 0.8727  | 42 | 0.16307 | 5  | 0.99986 | 0  | 1       | 22  | 0.999999584 |
| C9orf142 | 503 | 7  | 0.99928 | 12 | 1       | 4  | 0.99997 | 2  | 0.99979 | 76  | 0.000242781 |
| TUBGCP2  | 503 | 10 | 0.98777 | 43 | 0.12244 | 4  | 0.99997 | 1  | 0.99998 | 31  | 0.999470245 |
| C2orf3   | 496 | 6  | 0.99974 | 13 | 1       | 4  | 0.99996 | 0  | 1       | 28  | 0.999895136 |
| DOT1L    | 496 | 13 | 0.91015 | 55 | 0.0007  | 12 | 0.90793 | 7  | 0.90607 | 72  | 0.001097916 |
| HENMT1   | 494 | 11 | 0.97032 | 20 | 0.99865 | 7  | 0.9978  | 4  | 0.99382 | 62  | 0.044781579 |
| MATR3    | 491 | 4  | 0.99998 | 7  | 1       | 1  | 1       | 0  | 1       | 39  | 0.960373543 |
| RPH3AL   | 491 | 7  | 0.99901 | 27 | 0.93971 | 8  | 0.9937  | 3  | 0.99839 | 20  | 0.999999866 |
| TMCO6    | 491 | 3  | 1       | 6  | 1       | 0  | 1       | 2  | 0.99973 | 58  | 0.121322222 |
| EXOSC8   | 487 | 6  | 0.99967 | 20 | 0.99825 | 7  | 0.9974  | 6  | 0.94918 | 21  | 0.999999508 |
| ASCL2    | 486 | 4  | 0.99998 | 24 | 0.98138 | 2  | 1       | 1  | 0.99998 | 45  | 0.763913254 |
| C13orf23 | 485 | 2  | 1       | 10 | 1       | 2  | 1       | 0  | 1       | 8   | 1           |
| TRAP1    | 483 | 6  | 0.99963 | 5  | 1       | 1  | 1       | 0  | 1       | 69  | 0.002087554 |
| HNRNPF   | 479 | 9  | 0.99084 | 9  | 1       | 2  | 1       | 0  | 1       | 68  | 0.002619685 |
| IFT140   | 478 | 11 | 0.96024 | 39 | 0.20964 | 5  | 0.99971 | 2  | 0.99965 | 26  | 0.999933443 |
| EOMES    | 477 | 3  | 1       | 11 | 1       | 1  | 1       | 0  | 1       | 99  | 2.03E-12    |
| GOLGA5   | 474 | 10 | 0.97802 | 31 | 0.71947 | 1  | 1       | 0  | 1       | 30  | 0.998813877 |
| MYCBP2   | 473 | 17 | 0.53709 | 29 | 0.82793 | 29 | 0.00131 | 16 | 0.04565 | 33  | 0.993772414 |
| BRAT1    | 472 | 7  | 0.99838 | 11 | 1       | 3  | 0.99999 | 1  | 0.99997 | 98  | 2.57E-12    |
| BCL3     | 468 | 7  | 0.99821 | 21 | 0.9935  | 17 | 0.40024 | 5  | 0.97248 | 48  | 0.488576399 |
| HOXA7    | 462 | 9  | 0.98679 | 15 | 0.99991 | 10 | 0.94945 | 11 | 0.39233 | 29  | 0.998834346 |
| DLEU1    | 461 | 11 | 0.94631 | 32 | 0.59004 | 7  | 0.99528 | 2  | 0.99951 | 145 | 1.00E-37    |
| RG9MTD1  | 461 | 2  | 1       | 5  | 1       | 1  | 1       | 0  | 1       | 38  | 0.929337507 |
| GALNS    | 458 | 5  | 0.9998  | 40 | 0.10561 | 9  | 0.97236 | 1  | 0.99995 | 22  | 0.999991473 |
| UAP1L1   | 458 | 5  | 0.9998  | 13 | 0.99998 | 0  | 1       | 0  | 1       | 69  | 0.000500337 |
| HMGNA4   | 454 | 10 | 0.96762 | 44 | 0.02317 | 6  | 0.99808 | 1  | 0.99995 | 74  | 2.48E-05    |
| RNH1     | 453 | 12 | 0.8949  | 27 | 0.85982 | 20 | 0.12718 | 6  | 0.92233 | 59  | 0.026386633 |
| FAT4     | 447 | 15 | 0.64629 | 45 | 0.0119  | 4  | 0.99984 | 1  | 0.99994 | 41  | 0.775533422 |
| EXOC5    | 444 | 4  | 0.99993 | 13 | 0.99997 | 1  | 1       | 1  | 0.99994 | 23  | 0.999953076 |

|         |     |    |         |    |          |    |         |    |         |    |             |
|---------|-----|----|---------|----|----------|----|---------|----|---------|----|-------------|
| KEAP1   | 444 | 8  | 0.99152 | 15 | 0.99979  | 6  | 0.99755 | 3  | 0.99622 | 14 | 0.999999996 |
| EIF2AK1 | 442 | 4  | 0.99993 | 8  | 1        | 2  | 1       | 1  | 0.99993 | 62 | 0.005156286 |
| GPR108  | 439 | 8  | 0.99051 | 17 | 0.99869  | 1  | 1       | 0  | 1       | 30 | 0.994177904 |
| HEATR2  | 437 | 15 | 0.61149 | 53 | 9.74E-05 | 3  | 0.99996 | 0  | 1       | 20 | 0.999994628 |
| SLC7A7  | 437 | 4  | 0.99992 | 11 | 1        | 1  | 1       | 1  | 0.99993 | 46 | 0.415834206 |
| MIPOL1  | 435 | 2  | 1       | 3  | 1        | 0  | 1       | 0  | 1       | 27 | 0.998704952 |
| MRPL38  | 434 | 13 | 0.78859 | 48 | 0.00158  | 3  | 0.99996 | 0  | 1       | 28 | 0.997539399 |
| NDUFS7  | 432 | 9  | 0.97538 | 30 | 0.58783  | 4  | 0.99976 | 2  | 0.99912 | 26 | 0.999198366 |
| JMJD8   | 430 | 10 | 0.94946 | 31 | 0.50155  | 1  | 1       | 0  | 1       | 33 | 0.967824526 |
| DNAJC2  | 429 | 4  | 0.99989 | 11 | 0.99999  | 5  | 0.99892 | 1  | 0.99991 | 19 | 0.999996475 |
| ETF1    | 429 | 3  | 0.99998 | 12 | 0.99998  | 0  | 1       | 2  | 0.99907 | 33 | 0.966683994 |
| NCSTN   | 428 | 6  | 0.99834 | 18 | 0.99594  | 9  | 0.9524  | 1  | 0.99991 | 75 | 1.51E-06    |
| PPIL6   | 428 | 2  | 1       | 7  | 1        | 5  | 0.99889 | 0  | 1       | 10 | 1           |
| KHSRP   | 427 | 19 | 0.20033 | 62 | 5.76E-08 | 15 | 0.46201 | 10 | 0.42138 | 59 | 0.008546646 |
